# Supplementary material
Source: PubMed Central journal article supplement (PMC5106293)

A single endoplasmic reticulum aminopeptidase-1 protein allotype is a strong risk factor for Behçet's disease in HLA-B\*51 carriers

Masaki Takeuchi, Michael J Ombrello, Yohei Kirino, Burak Erer, Ilknur Tugal-Tutkun, Emire Seyahi, Yilmaz Özyazgan, Norman Watts, Ahmet Gül, Daniel L Kastner, Elaine F Remmers

Online supplementary text:

*Patients and controls:* The individuals included in this study were either in the Turkish discovery collection or the Turkish replication collection described in the Kirino et al 2013 *Nature Genetics* report. The samples in this study (1,900 cases and 1,779 controls) are fewer than the combined Turkish discovery and Turkish replication collections because some samples were not available for genotyping or failed to pass our stringent quality control requirements. All the cases and controls were from Turkey and were genetically similar, i.e. there were no genetic outliers on the basis of principal components analysis of the genotypes of non-MHC markers genotyped on the same platform as the *ERAP1* region markers (Illumina ImmunoChip). All cases met the International Study Group criteria for Behçet's disease (Lancet 1990, 335:1078–1080); the controls were healthy and reported no first degree relatives with Behçet's disease. Table S1 lists the patient characteristics. All participants provided signed informed consent and the local ethics commission approved the genetic disease association analysis for the whole genome.

Legends to online supplementary figures:

Figure S1: Linkage disequilibrium in 1,779 Turkish controls among 10 non-synonymous coding *ERAP1* SNPs. a) Pairwise marker  $D'$  values are in boxes connecting the markers. The numbers in the boxes are the  $D'$  value times 100. Empty boxes have  $D' = 1.00$ . b) Pairwise marker  $r^2$  values are in boxes connecting the markers. The numbers in the boxes are the  $r^2$  values times 100. The figures were generated with Haploview 4.2

(<https://www.broadinstitute.org/scientific-community/science/programs/medical-and-population-genetics/haploview/haploview>).

Figure S2: Behçet's disease association of imputed *ERAP1* region SNPs. P-values from the results of a recessive genotype association test are shown for the imputed SNP data from 1,900 cases and 1,779 controls from Turkey. The green horizontal line shows the significance level of

homozygosity for Hap10 ( $P = 3.12 \times 10^{-6}$ ) in 1,876 cases and 1,761 controls with high probability predicted haplotypes. Two noncoding SNPs with somewhat greater significance, but lower odds ratios are labeled. The x axis shows the positions of the SNPs on chromosome 5; transcript maps are shown below the plot.

## Online Supplementary Tables

Table S1: Demographic and clinical characteristics of patients with Behçet's disease

### 1A. Patients from the first GWAS (1130 out of 1215)

| <i>Characteristic</i>              | <i>Frequency</i>        |
|------------------------------------|-------------------------|
| Male / Female, n (%)               | 611 / 519 (54.1 / 45.9) |
| Mean age $\pm$ SD (range)          | 39.0 $\pm$ 12.0 (13-79) |
| Recurrent oral aphthous ulcers (%) | 100                     |
| Genital ulcers (%)                 | 72.8                    |
| Folliculitis (%)                   | 79.7                    |
| Erythema nodosum (%)               | 50.6                    |
| Pathergy reaction (n=945) (%)      | 80.0                    |
| Uveitis (%)                        | 35.8                    |
| Arthritis                          | 48.2                    |
| Vascular involvement (%)           | 25.3                    |
| Neurologic involvement (%)         | 8.6                     |
| Intestinal involvement (%)         | 1.1                     |
| Positive family history (%)        | 19.6                    |

### 1B. Patients from the replication group (770 out of 838)

| <i>Characteristic</i>              | <i>Frequency</i>        |
|------------------------------------|-------------------------|
| Male / Female, n (%)               | 404 / 366 (52.5 / 47.5) |
| Mean age $\pm$ SD (range)          | 38.4 $\pm$ 11.0 (10-74) |
| Recurrent oral aphthous ulcers (%) | 100                     |
| Genital ulcers (%)                 | 82.9                    |
| Folliculitis (%)                   | 73.5                    |
| Erythema nodosum (%)               | 57.9                    |
| Pathergy reaction (n=643) (%)      | 49.3                    |
| Uveitis (%)                        | 43.6                    |
| Arthritis                          | 39.6                    |
| Vascular involvement (%)           | 19.6                    |
| Neurologic involvement (%)         | 5.5                     |
| Intestinal involvement (%)         | 1.7                     |
| Positive family history (%)        | 18.3                    |

1C. Whole study group (n= 1900)

| <i>Characteristic</i>              | <i>Frequency</i>         |
|------------------------------------|--------------------------|
| Male / Female, n (%)               | 1015 / 885 (53.4 / 46.6) |
| Mean age $\pm$ SD (range)          | 38.7 $\pm$ 11.6 (10-79)  |
| Recurrent oral aphthous ulcers (%) | 100                      |
| Genital ulcers (%)                 | 77.8                     |
| Folliculitis (%)                   | 78.2                     |
| Erythema nodosum (%)               | 54.2                     |
| Pathergy reaction (n=1588) (%)     | 67.6                     |
| Uveitis (%)                        | 39.4                     |
| Arthritis                          | 45.8                     |
| Vascular involvement (%)           | 23.2                     |
| Neurologic involvement (%)         | 7.4                      |
| Intestinal involvement (%)         | 1.3                      |
| Positive family history (%)        | 19.2                     |

Table S2: Frequency of *ERAP1* non-synonymous coding SNPs with minor allele frequency greater than 0.01 in the 1000 Genomes Project EUR superpopulation and in Turkish controls.

| <i>SNP ID</i> | <i>Amino acid change (ancestral/non-ancestral)*</i> | <i>Nucleotide change (ancestral/non-ancestral)</i> | <i>Codon change</i> | <i>Non-ancestral allele frequency in EUR superpopulation Non-ancestral alleles/total alleles (%)</i> | <i>Non-ancestral allele frequency in Turkish controls Non-ancestral alleles/total alleles (%)</i> |
|---------------|-----------------------------------------------------|----------------------------------------------------|---------------------|------------------------------------------------------------------------------------------------------|---------------------------------------------------------------------------------------------------|
| rs72773968    | Thr12Ile                                            | C/T                                                | T (ACC) → I (ATC)   | 139/1006 (13.8)                                                                                      | 393/3558 (11.0)                                                                                   |
| rs3734016     | Glu56Lys                                            | G/A                                                | E (GAG) → K (AAG)   | 41/1006 (4.1)                                                                                        | 86/3514 (2.4)                                                                                     |
| rs26653       | Pro127Arg                                           | C/G                                                | P (CCT) → R (CGT)   | 284/1006 (28.2)                                                                                      | 1281/3558 (36.0)                                                                                  |
| rs26618       | Ile276Met                                           | A/G                                                | I (ATA) → M (ATG)   | 220/1006 (21.9)                                                                                      | 846/3558 (23.8)                                                                                   |
| rs27895       | Gly346Asp                                           | G/A                                                | G (GGC) → D (GAC)   | 64/1006 (6.4)                                                                                        | 297/3510 (8.5)                                                                                    |
| rs2287987     | Met349Val                                           | A/G                                                | M (ATG) → V (GTG)   | 226/1006 (22.5)                                                                                      | 496/3526 (14.1)                                                                                   |
| rs30187       | Lys528Arg                                           | A/G                                                | K (AAG) → R (AGG)   | 654/1006 (65.0)                                                                                      | 2202/3558 (61.9)                                                                                  |
| rs10050860    | Asp575Asn                                           | G/A                                                | D (GAC) → N (AAC)   | 230/1006 (22.9)                                                                                      | 514/3558 (14.4)                                                                                   |
| rs17482078    | Arg725Gln                                           | G/A                                                | R (CGA) → Q (CAA)   | 225/1006 (22.4)                                                                                      | 508/3558 (14.3)                                                                                   |
| rs27044       | Gln730Glu                                           | C/G                                                | Q (CAA) → E (GAA)   | 719 (71.5)                                                                                           | 2649/3532 (75.0)                                                                                  |

\*The ancestral allele is defined as the allele present in the chimpanzee sequence.

Table S3: Common *ERAP1* coding variant haplotypes (with greater than 1% frequency) and frequency-based associations of haplotypes with Behçet's disease in 3,752 case haplotypes and 3,522 control haplotypes from Turkey.

| Coding haplo-type <sup>a</sup> | Amino acid position |     |     |     |     |     |     |     |     |     | Hap freq cases n (%) | Hap freq ctrls n (%) | P-value <sup>b</sup> | Homozyg hap odds ratio (95% CI) |
|--------------------------------|---------------------|-----|-----|-----|-----|-----|-----|-----|-----|-----|----------------------|----------------------|----------------------|---------------------------------|
|                                | 12                  | 56  | 127 | 276 | 346 | 349 | 528 | 575 | 725 | 730 |                      |                      |                      |                                 |
| Hap1                           | Ile <sup>c</sup>    | Glu | Pro | Ile | Gly | Met | Lys | Asp | Arg | Gln | 388 (10.3)           | 383 (10.9)           | 4.60E-01             | 0.95 (0.81-1.10)                |
| Hap2                           | Thr                 | Glu | Arg | Ile | Gly | Met | Lys | Asp | Arg | Gln | 458 (12.2)           | 491 (13.9)           | 2.82E-02             | 0.86 (0.75-0.98)                |
| Hap3                           | Thr                 | Glu | Arg | Ile | Gly | Met | Lys | Asp | Arg | Glu | 501 (13.4)           | 454 (12.9)           | 5.59E-01             | 1.04 (0.91-1.19)                |
| Hap5                           | Thr                 | Glu | Arg | Ile | Asp | Met | Arg | Asp | Arg | Glu | 321 (8.6)            | 292 (8.3)            | 6.85E-01             | 1.03 (0.88-1.22)                |
| Hap6                           | Thr                 | Glu | Pro | Ile | Gly | Met | Arg | Asp | Arg | Glu | 513 (13.7)           | 431 (12.2)           | 6.87E-02             | 1.14 (0.99-1.30)                |
| Hap7                           | Thr                 | Lys | Pro | Ile | Gly | Met | Arg | Asp | Arg | Glu | 106 (2.8)            | 85 (2.4)             | 2.72E-01             | 1.18 (0.88-1.57)                |
| Hap8                           | Thr                 | Glu | Pro | Met | Gly | Met | Arg | Asp | Arg | Glu | 790 (21.1)           | 840 (23.9)           | 4.28E-03             | 0.85 (0.76-0.95)                |
| Hap10                          | Thr                 | Glu | Pro | Ile | Gly | Val | Arg | Asn | Gln | Glu | 631 (16.8)           | 504 (14.3)           | 3.23E-03             | 1.21 (1.07-1.38)                |

<sup>a</sup>Haplotype numbers according to Ombrello et al, 2015. The 8 haplotypes listed account for 98.8% of all the haplotypes in the Turkish controls.

<sup>b</sup>Significance after Bonferroni correction is  $P < 3.12E-03$  ( $0.05/[8 \text{ haplotypes} \times 2 \text{ models}]$ ). No haplotypes were significant.

<sup>c</sup>Yellow highlight indicates the non-ancestral amino acid; the ancestral amino acid is the amino acid found in the chimpanzee sequence.



Figure S2

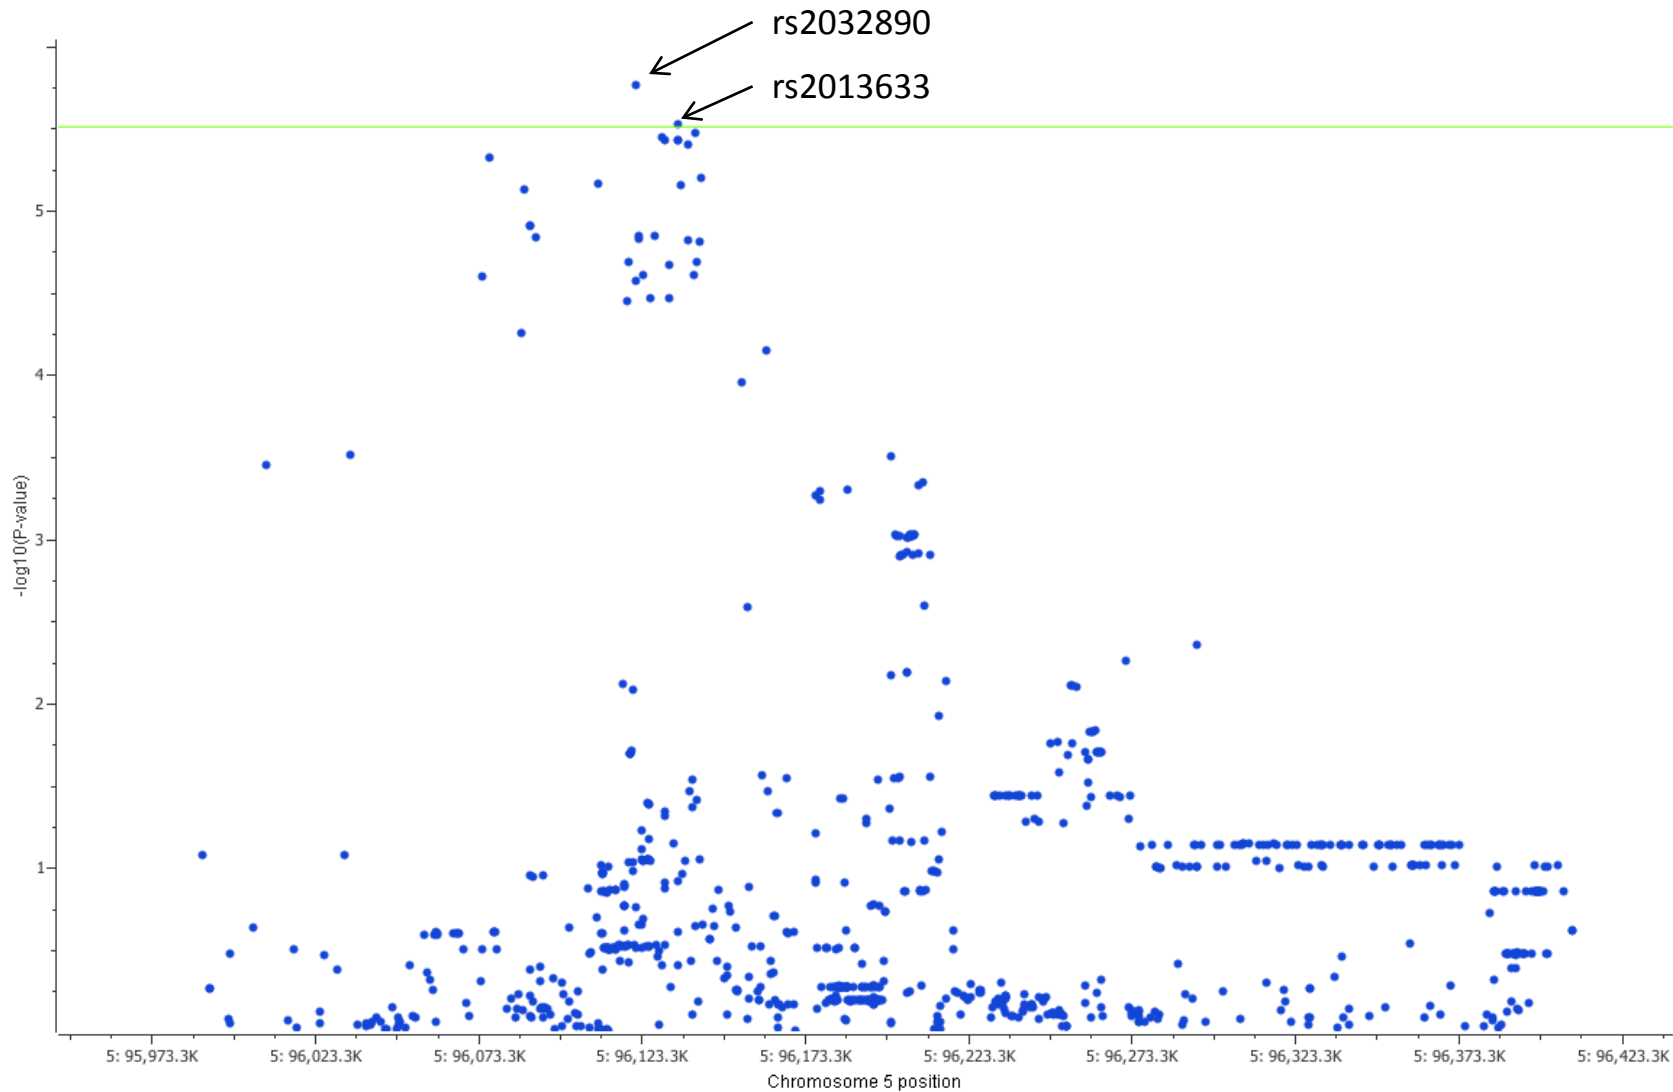

RefSeq Genes 63, UCSC

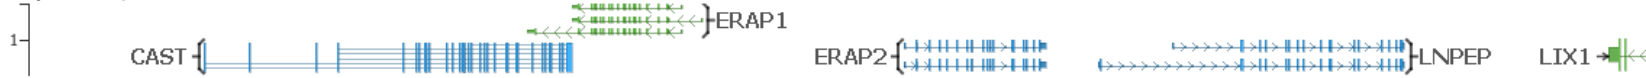

Supplement: NIHMS823069-supplement-Online_supplementary_materials.pdf [file NIHMS823069-supplement-Online_supplementary_materials.pdf]
